# Supplementary material
Source: publisher figshare collection journal article supplement (https://aacr.figshare.com/articles/dataset/_/23391335)
Supplement: Supplementary file 1 [file 41119928]

Figure S1

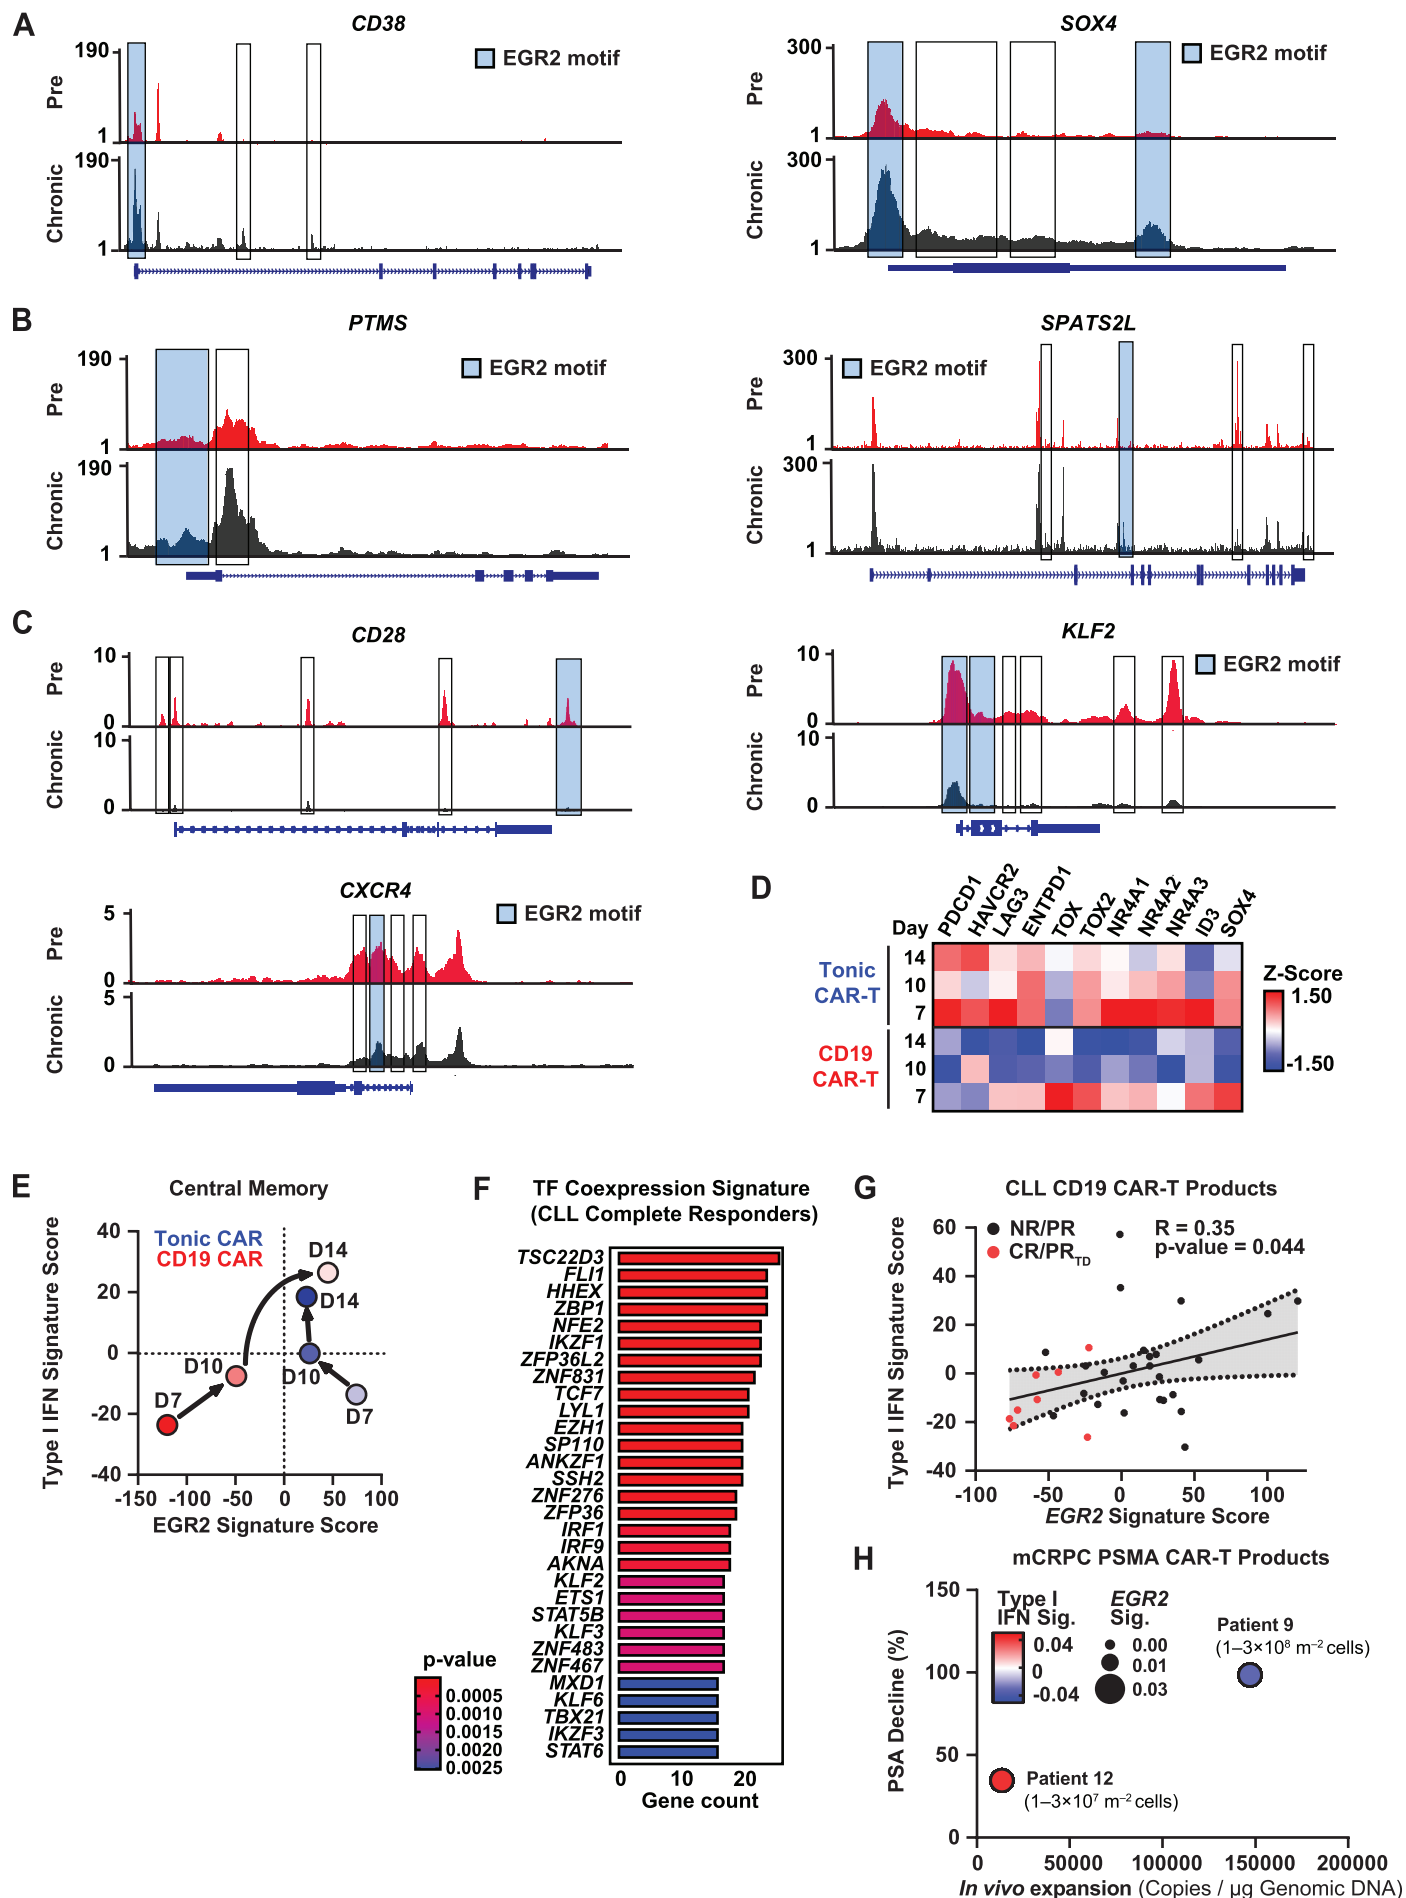

**Supplementary Figure 1. Analysis of EGR2 and type I IFN pathway regulation in CAR T-cells.** (A-C) ATAC-seq tracks of genes associated with dysfunction, type I IFN signaling, and memory differentiation are shown, with differentially accessible regions indicated. **D**, Heatmap showing expression of exhaustion genes in tonically signaling GD2 and functional CD19 naïve CD8<sup>+</sup> CAR-T cells (GSE136891). **E**, Comparison of EGR2 and type I IFN gene signature scores in central memory CD8<sup>+</sup> T-cells expressing a tonically signaling GD2 CAR and control CD19 CAR. CAR T-cells were generated using T-cells from a healthy donor (GSE136891). **F**, Top transcription factor co-expression signatures overexpressed in CD19 CAR T-cell products of CLL complete responders. **G**, Comparison of EGR2 and type I IFN signature scores in unstimulated CD19 CAR T-cell products from CLL patients (CR: complete response, PR<sub>TD</sub>: very good partial response, PR: conventional partial response, NR: no response). **H**, Comparison of type I IFN and EGR2 module scores in PSMA CAR T-cells from lymphodepleted prostate cancer patients, and their association with *in vivo* CAR T-cell proliferation and PSA decline.
